# Supplementary material for: Yerba Mate Extract in Microfibrillated Cellulose and Corn Starch Films as a Potential Wound Healing Bandage
Source: PubMed Central journal article supplement (PMC7761128; doi:10.3390/polym12122807), 2020-11-27
Supplement: polymers-12-02807-s001.pdf [file polymers-12-02807-s001.pdf]

## Supplemental Information

### ***Yerba mate extract in Microfibrillated cellulose and Corn Starch films as a potential wound healing bandage***

Meysam Aliabadi <sup>1</sup>, Bor Shin Chee <sup>2</sup>, Mailson Matos <sup>3</sup>, Yvonne J. Cortese <sup>2</sup>, Michael J. D. Nugent <sup>2</sup>, Tielidy A. M. de Lima <sup>2</sup>, Washington L. E. Magalhães <sup>4</sup>, Gabriel Goetten de Lima <sup>3\*</sup>

<sup>1</sup> Department of Paper sciences and engineering, Gorgan University of Agricultural Sciences and Natural Resources, Gorgan, Iran

<sup>2</sup> Materials Research Institute, Athlone Institute of Technology, Athlone, Ireland

<sup>3</sup> Programa de Pós-Graduação em Engenharia e Ciência dos Materiais - PIPE, Universidade Federal do Paraná, Curitiba, Paraná, Brazil

<sup>4</sup> Embrapa Florestas, Colombo, Brazil

\* Corresponding authors: [ggoetten@research.ait.ie](mailto:ggoetten@research.ait.ie)

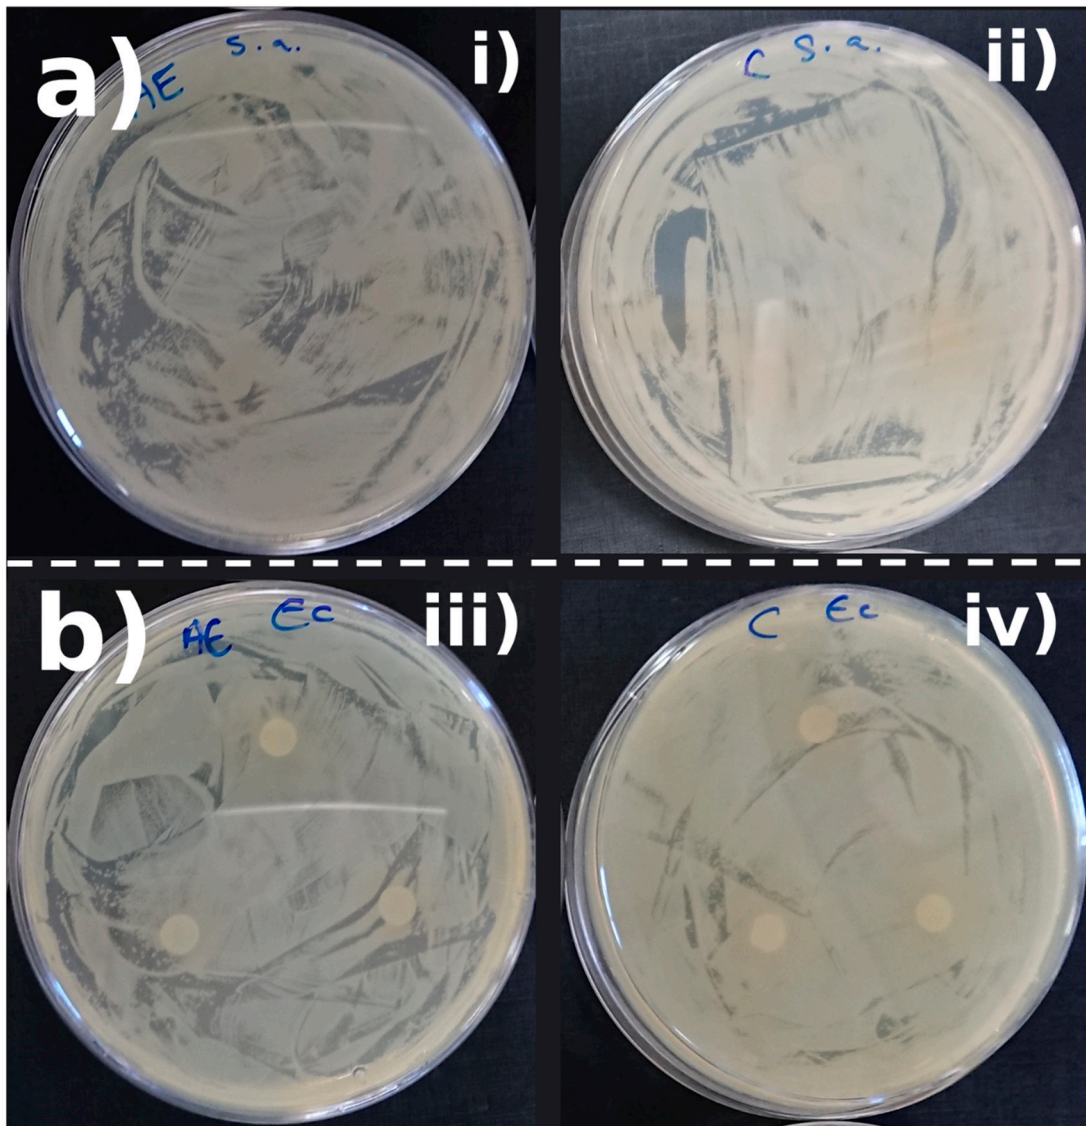

**Figure S.1.** Antimicrobial disk diffusion test macroscopic images for bacteria inhibition after 24 h for *S. aureus* (a) and *E. coli* (b) where (i,iii) A-MFC+YM10, (ii,iv) D-MFC+YM10

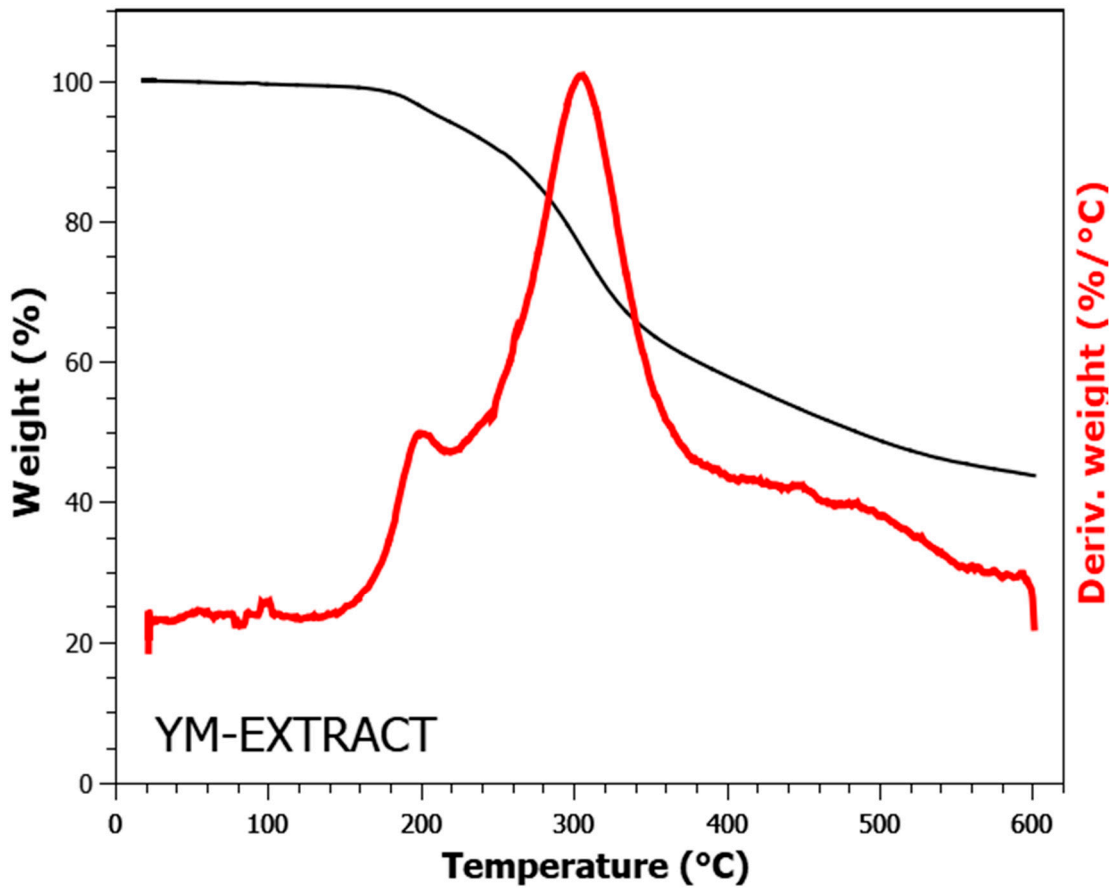

Figure S.2. Thermogravimetric analysis with its first derivative for the yerba-mate extract.

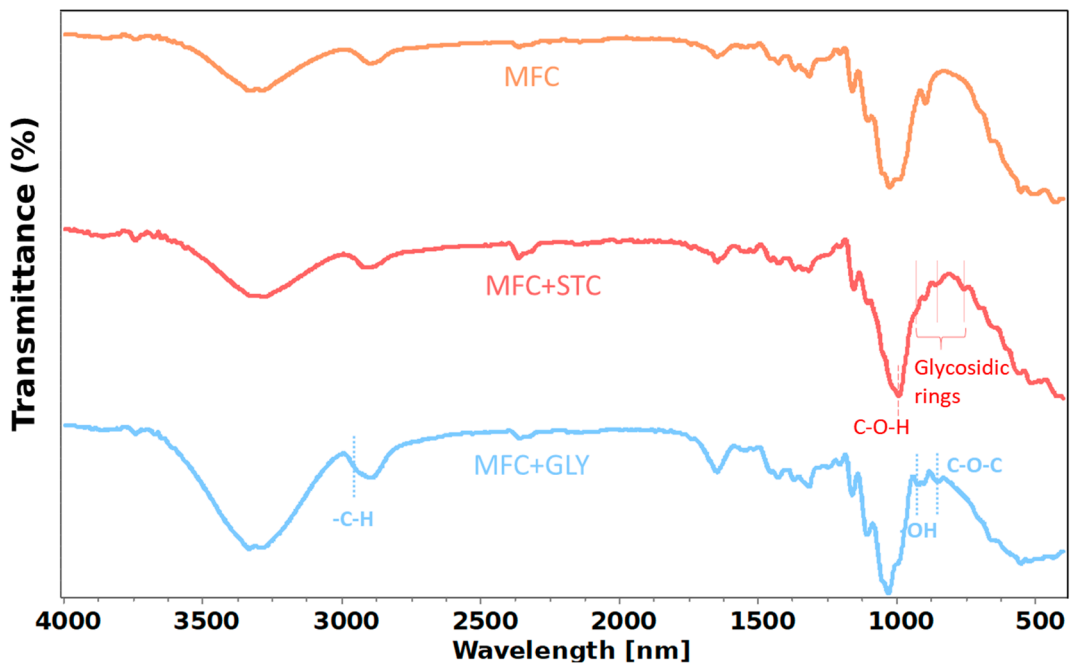

Figure S.3. FTIR of the raw materials, pure MFC, MFC blended with starch (MFC+STC) and MFC blended with glycerine (MFC+GLY).

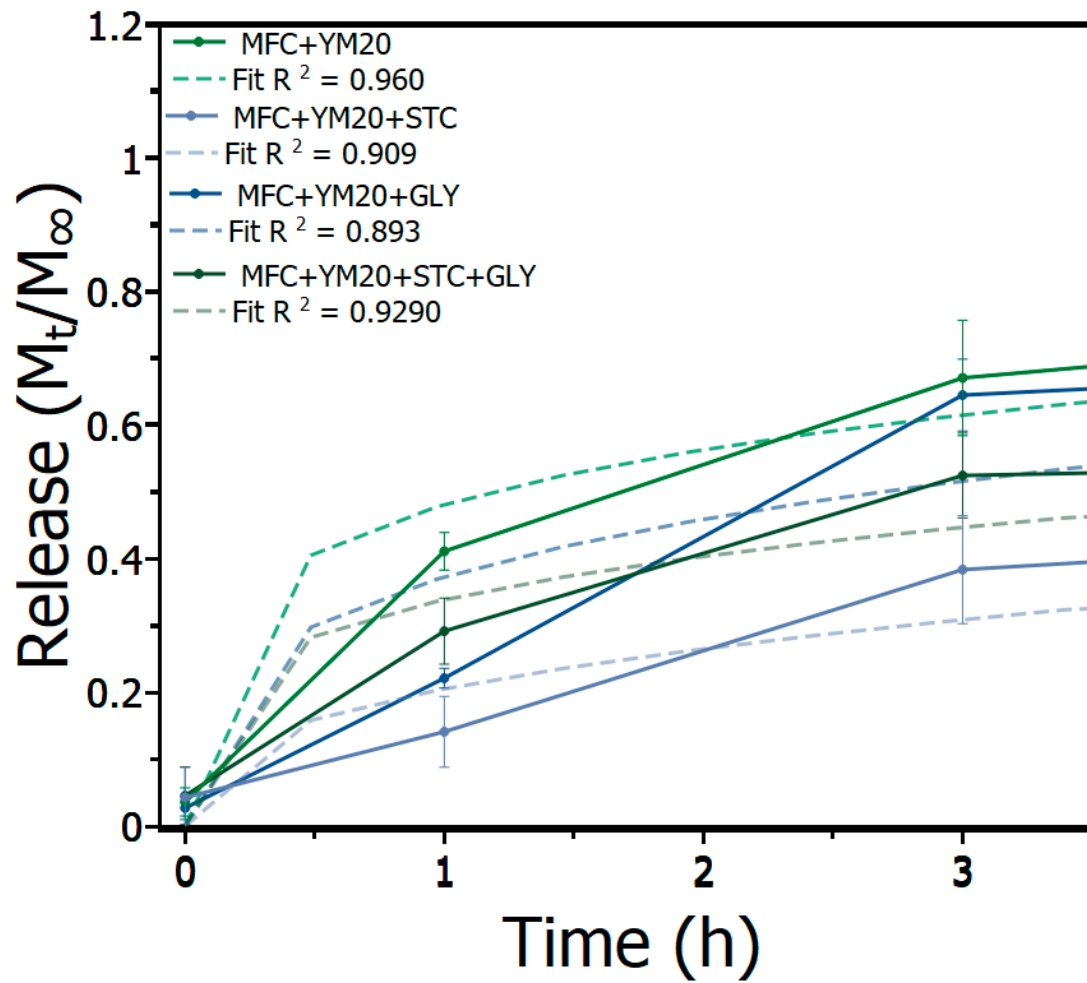

**Figure S.4.** Yerba mate extract release in the initial release of three hours with best-fit using Korsmeyer-peppas correlation for each curve.

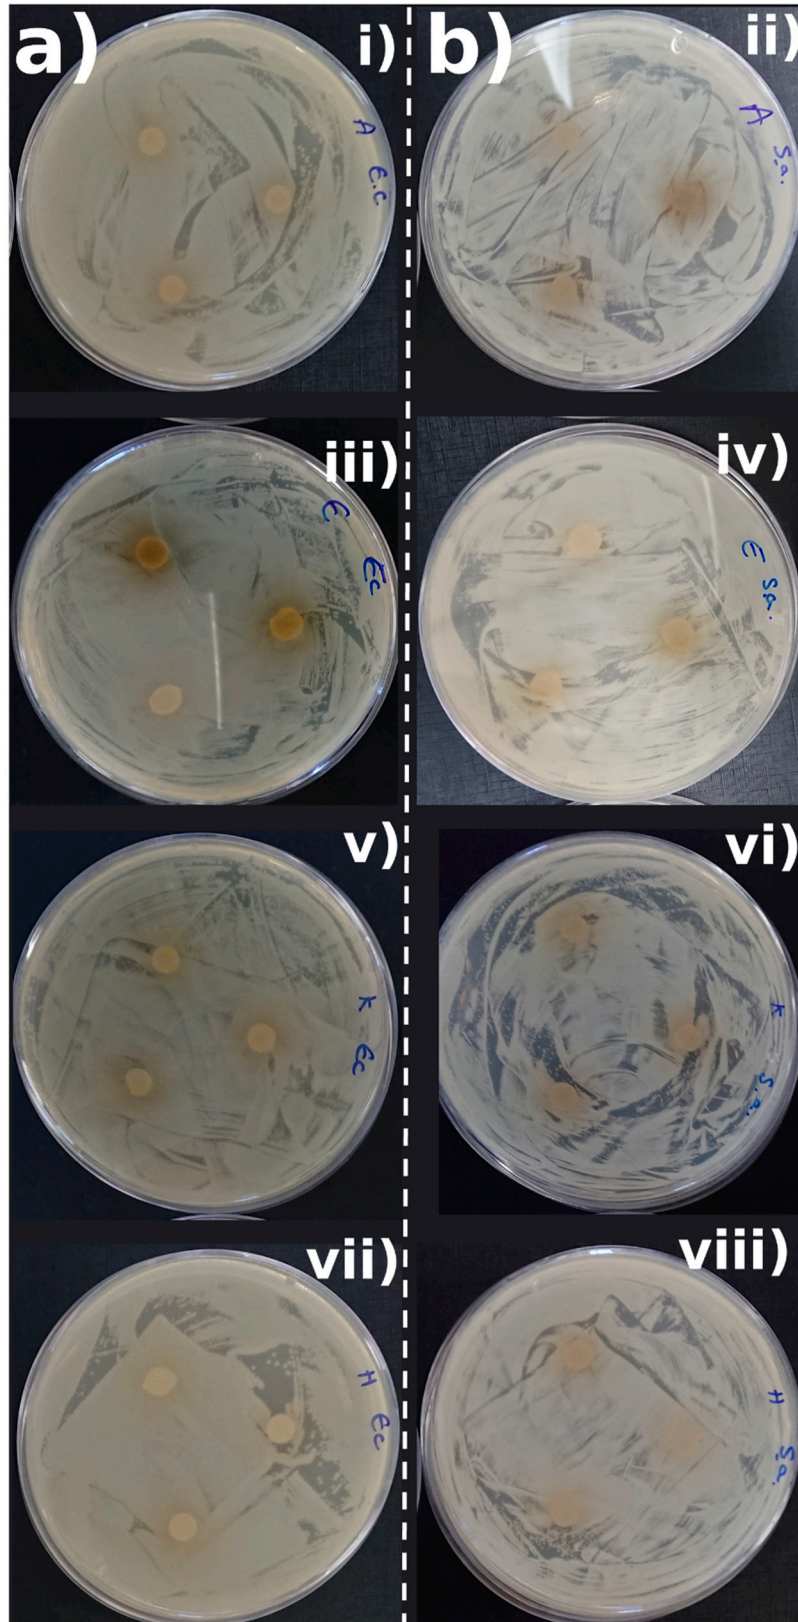

**Figure S.5.** Antimicrobial disk diffusion test macroscopic images for bacteria inhibition after 24 h for *S. aureus* (a) and *E. coli* (b) where (i,ii) MFC+YM20, (iii,iv) MFC+YM20+STC, (v, vi) MFC+YM20+GLY, (vii, viii) MFC+YM20+STC+GLY

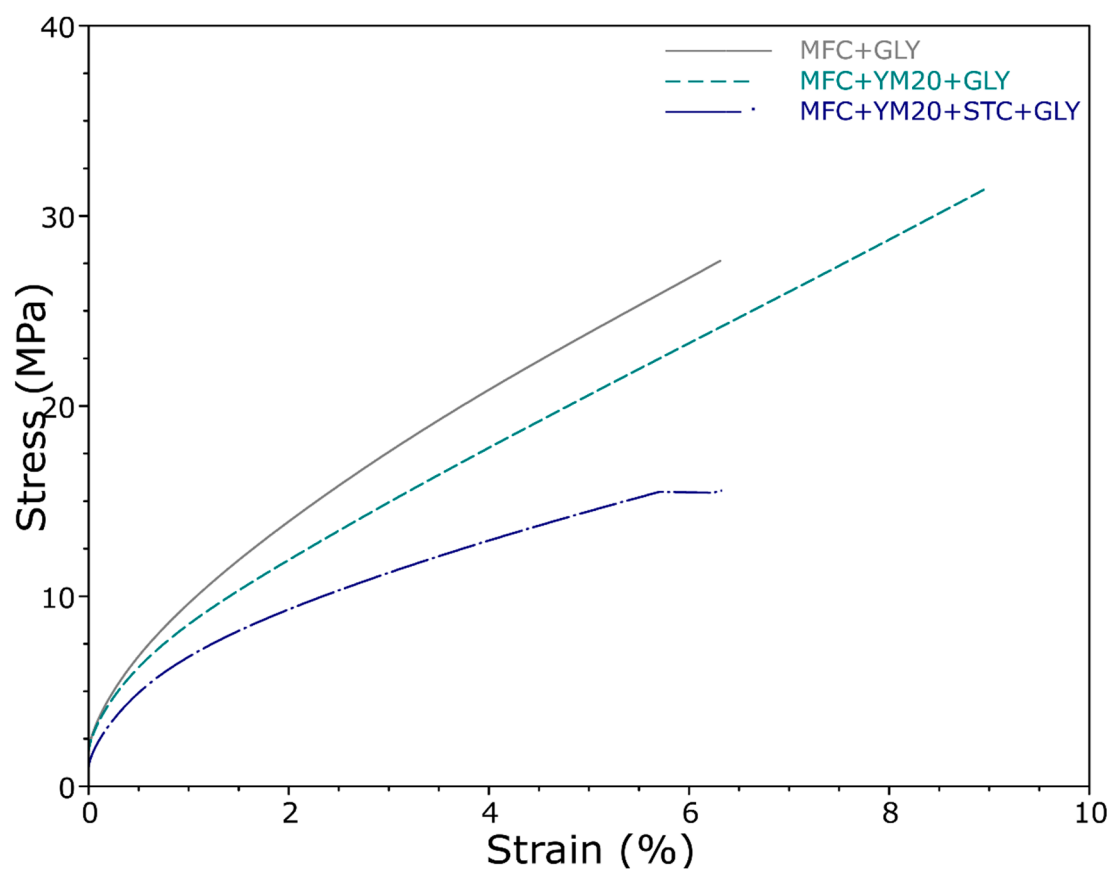

**Figure S.6.** Stress – strain for the MFC films containing glycerine by DMA.
